# Supplementary material for: Flaxseed Powder Attenuates Non-Alcoholic Steatohepatitis via Modulation of Gut Microbiota and Bile Acid Metabolism through Gut–Liver Axis
Source: MDPI journal article supplement (doi:10.3390/ijms221910858), 2021-10-08
Supplement: s1 [file s1]

**Table S1.** Fecal BA concentrations in the control and HFD group.

| BAs (µg/g)     | Control      | HFD           | P-value | HFD/Co      |                 |
|----------------|--------------|---------------|---------|-------------|-----------------|
|                | Mean ± SD    | mean ± SD     |         | Fold Change | log2(FC_HFD/Co) |
| alloLCA        | 2.09±1.60    | 1.46±0.77     | 0.64    |             | 0.52            |
| LCA            | 35.87±24.57  | 106.41±37.62  | 0.00*   | 2.97        | 1.57            |
| isoLCA         | 2.22±1.34    | 3.73±1.59     | 0.04*   | 1.68        | 0.75            |
| NorDCA         | 0.50±0.52    | 0.51±0.25     | 0.79    | 1.02        | 0.03            |
| 12-ketoLCA     | 54.63±9.51   | 119.58±58.05  | 0.01*   | 2.19        | 1.13            |
| 7-ketoLCA      | 1.12±0.84    | 12.16±7.97    | 0.00*   | 10.88       | 3.44            |
| beta-UDCA      | 2.72±1.98    | 9.43±4.45     | 0.00*   | 3.47        | 1.80            |
| DCA            | 265.65±59.37 | 426.23±80.22  | 0.00*   | 1.60        | 0.68            |
| CDCA           | 12.86±10.77  | 54.19±27.43   | 0.00*   | 4.21        | 2.08            |
| UDCA           | 9.29±4.32    | 15.93±6.34    | 0.05    | 1.72        | 0.78            |
| HDCA           | 68.31±39.39  | 159.77±54.25  | 0.01*   | 2.34        | 1.23            |
| NorCA          | 2.14±2.20    | 0.03±0.07     | 0.00*   | 0.01        | 6.10            |
| 7,12-diketoLCA | 1.64±1.85    | 0.16±0.46     | 0.05    | 0.10        | 3.33            |
| alpha-MCA      | 48.17±25.40  | 83.65±69.29   | 0.43    | 1.74        | 0.80            |
| UCA            | 4.70±5.81    | 4.86±3.43     | 0.49    | 1.03        | 0.05            |
| beta-MCA       | 101.57±52.19 | 128.60±103.41 | 0.96    | 1.27        | 0.34            |
| CA             | 70.59±103.39 | 117.90±170.65 | 0.37    | 1.67        | 0.74            |
| ACA            | 12.84±15.39  | 13.36±17.66   | 0.96    | 1.04        | 0.06            |
| beta-CA        | 141.28±42.92 | 203.29±80.85  | 0.10    | 1.44        | 0.52            |
| GLCA           | 0.00±0.00    | 0.03±0.03     | 0.00*   | 60.50       | 5.92            |
| GHDCA          | 0.00±0.01    | 0.04±0.06     | 0.04*   | 18.13       | 4.18            |
| GUDCA          | 0.00±0.01    | 0.04±0.06     | 0.16    | 10.73       | 3.42            |
| GDCA           | 0.70±0.71    | 1.74±1.29     | 0.05    | 2.48        | 1.31            |
| LCA-3S         | 0.03±0.03    | 0.02±0.05     | 0.60    | 0.85        | 0.23            |
| GCA            | 0.21±0.48    | 0.45±0.89     | 0.24    | 2.13        | 1.09            |
| TLCA           | 0.02±0.03    | 0.46±0.47     | 0.01*   | 23.13       | 4.53            |
| THDCA+TUDCA    | 0.77±1.31    | 3.14±6.29     | 0.02*   | 4.06        | 2.02            |
| TDCA           | 1.67±1.97    | 8.35±10.28    | 0.03*   | 4.99        | 2.32            |
| TCDCa          | 0.22±0.33    | 1.32±2.31     | 0.04*   | 5.95        | 2.57            |
| TCA            | 6.04±10.97   | 18.65±35.07   | 0.05*   | 3.09        | 1.63            |
| T-alpha-MCA    | 5.45±9.92    | 10.31±25.98   | 0.27    | 1.89        | 0.92            |
| T-beta-MCA     | 5.37±9.81    | 10.46±26.41   | 0.27    | 1.95        | 0.96            |

The data are presented as the mean ± SD. BA species include unconjugated, taurine-conjugated, and glycine-conjugated BAs. The p value was determined by Mann–Whitney U test.

**Table S2.** Fecal BA concentrations in the FLA-fed and HFD group.

| BAs (µg/g)     | HFD           | Low           | Middle        | High          | Low/HFD |         | Middle/HFD |         | High/HFD |         |
|----------------|---------------|---------------|---------------|---------------|---------|---------|------------|---------|----------|---------|
|                | mean ± SD     | mean ± SD     | mean ± SD     | mean ± SD     | FC      | p-value | FC         | p-value | FC       | p-value |
| alloLCA        | 1.46±0.77     | 3.04±1.24     | 3.01±1.38     | 5.69±3.51     | 2.08    | 0.02*   | 2.06       | 0.02*   | 3.90     | 0.00*   |
| LCA            | 106.41±37.62  | 91.87±41.69   | 135.76±67.34  | 229.94±32.77  | 0.86    | 0.37    | 1.28       | 0.71    | 2.16     | 0.00*   |
| isoLCA         | 3.73±1.59     | 4.92±1.76     | 7.48±5.35     | 13.66±4.79    | 1.32    | 0.27    | 2.01       | 0.23    | 3.66     | 0.00*   |
| NorDCA         | 0.51±0.25     | 0.42±0.18     | 0.90±0.45     | 0.85±0.19     | 0.82    | 0.96    | 1.76       | 0.05    | 1.66     | 0.01*   |
| 12-ketoLCA     | 119.58±58.05  | 94.79±43.76   | 156.40±68.78  | 148.11±58.78  | 0.79    | 0.64    | 1.31       | 0.43    | 1.24     | 0.49    |
| 7-ketoLCA      | 12.16±7.97    | 5.23±3.68     | 8.41±6.08     | 13.00±4.00    | 0.43    | 0.08    | 0.69       | 0.27    | 1.07     | 0.64    |
| beta-UDCA      | 9.43±4.45     | 14.98±6.24    | 17.79±10.87   | 25.27±3.72    | 1.59    | 0.05    | 1.89       | 0.02*   | 2.68     | 0.00*   |
| DCA            | 426.23±80.22  | 445.61±76.05  | 525.08±70.87  | 514.60±43.06  | 1.05    | 0.49    | 1.23       | 0.04*   | 1.21     | 0.03*   |
| CDCA           | 54.19±27.43   | 45.05±26.23   | 73.48±19.75   | 61.73±17.46   | 0.83    | 0.43    | 1.36       | 0.10    | 1.14     | 0.23    |
| UDCA           | 15.93±6.34    | 25.66±10.14   | 29.52±12.18   | 36.56±9.56    | 1.61    | 0.07    | 1.85       | 0.02*   | 2.29     | 0.00*   |
| HDCA           | 159.77±54.25  | 206.37±91.75  | 312.83±117.68 | 343.92±92.54  | 1.29    | 0.32    | 1.96       | 0.01*   | 2.15     | 0.00*   |
| NorCA          | 0.03±0.07     |               |               | 0.20±0.15     |         |         |            |         | 6.41     | 0.02*   |
| 7,12-diketoLCA | 0.16±0.46     | 1.12±1.25     | 0.67±0.84     | 0.76±0.76     | 6.83    | 0.07    | 4.13       | 0.09    | 4.65     | 0.09    |
| alpha-MCA      | 83.65±69.29   | 101.66±60.92  | 180.64±155.05 | 383.15±134.62 | 1.22    | 0.43    | 2.16       | 0.05    | 4.58     | 0.00*   |
| UCA            | 4.86±3.43     | 6.26±3.33     | 9.80±6.35     | 9.24±7.16     | 1.29    | 0.32    | 2.02       | 0.03*   | 1.90     | 0.23    |
| beta-MCA       | 128.60±103.41 | 147.27±86.34  | 193.76±54.07  | 376.35±165.01 | 1.15    | 0.43    | 1.51       | 0.08    | 2.93     | 0.01*   |
| CA             | 117.90±170.65 | 142.08±150.00 | 104.41±56.69  | 185.17±145.48 | 1.21    | 0.43    | 0.89       | 0.19    | 1.57     | 0.19    |
| ACA            | 13.36±17.66   | 11.54±10.59   | 12.16±7.18    | 18.51±14.20   | 0.86    | 0.64    | 0.91       | 0.43    | 1.39     | 0.23    |
| beta-CA        | 203.29±80.85  | 179.27±71.92  | 354.87±340.40 | 517.02±135.75 | 0.88    | 0.87    | 1.75       | 0.37    | 2.54     | 0.00*   |
| GLCA           | 0.03±0.03     | 0.01±0.01     | 0.02±0.04     | 0.06±0.05     | 0.24    | 0.12    | 0.59       | 0.17    | 1.88     | 0.29    |
| GHDCA          | 0.04±0.06     | 0.02±0.03     | 0.05±0.14     | 0.15±0.14     | 0.49    | 0.67    | 1.21       | 0.58    | 3.32     | 0.03*   |
| GUDCA          | 0.04±0.06     | 0.02±0.02     | 0.06±0.14     | 0.14±0.13     | 0.51    | 0.75    | 1.30       | 0.83    | 3.12     | 0.06    |

|             |             |           |           |            |      |      |      |       |      |       |
|-------------|-------------|-----------|-----------|------------|------|------|------|-------|------|-------|
| GDCA        | 1.74±1.29   | 1.32±0.85 | 1.41±0.88 | 1.92±1.00  | 0.76 | 0.71 | 0.81 | 0.71  | 1.10 | 0.71  |
| GCA         | 0.45±0.89   | 0.22±0.30 | 0.07±0.08 | 0.34±0.46  | 0.49 | 0.67 | 0.15 | 0.40  | 0.75 | 0.75  |
| TLCA        | 0.46±0.47   | 0.14±0.18 | 0.13±0.09 | 0.64±0.43  | 0.31 | 0.06 | 0.28 | 0.04* | 1.38 | 0.19  |
| THDCA+TUDCA | 3.14±6.29   | 1.28±0.81 | 1.41±0.78 | 4.17±2.06  | 0.41 | 0.71 | 0.45 | 0.49  | 1.33 | 0.02* |
| TDCA        | 8.35±10.28  | 3.53±2.68 | 3.99±1.95 | 8.01±4.68  | 0.42 | 0.37 | 0.48 | 0.43  | 0.96 | 0.56  |
| TCDCA       | 1.32±2.31   | 0.30±0.18 | 0.42±0.29 | 0.89±0.48  | 0.23 | 0.16 | 0.32 | 0.34  | 0.67 | 0.32  |
| TCA         | 18.65±35.07 | 6.66±4.32 | 5.15±1.63 | 7.71±6.30  | 0.36 | 0.87 | 0.28 | 0.23  | 0.41 | 0.64  |
| T-alpha-MCA | 10.31±25.98 | 1.95±2.03 | 1.22±0.95 | 9.41±12.12 | 0.19 | 0.63 | 0.12 | 0.87  | 0.91 | 0.41  |
| T-beta-MCA  | 10.46±26.41 | 1.93±2.02 | 1.23±0.93 | 9.64±12.55 | 0.18 | 0.63 | 0.12 | 0.87  | 0.92 | 0.41  |

FC, Fold Change; 12-OH bile acids include CA, DCA and their taurine-conjugated and glycine-conjugated forms, ACA, and 23-norDCA; all other BAs are the non-12-OH bile acids. The data are presented as the mean ± SD. BA species include unconjugated, taurine-conjugated, and glycine-conjugated BAs. The p value was determined by Mann–Whitney U test.

**Table S3.** The number of microbial taxa at each level

| <b>Group</b>  | <b>Sample</b> | <b>Phylum</b> | <b>Class</b> | <b>Order</b> | <b>Family</b> | <b>Genus</b> | <b>Species</b> |
|---------------|---------------|---------------|--------------|--------------|---------------|--------------|----------------|
| <b>CO</b>     | CO2_1         | 9             | 15           | 18           | 27            | 30           | 20             |
|               | CO2_2         | 7             | 13           | 16           | 24            | 28           | 18             |
|               | CO2_3         | 9             | 15           | 16           | 28            | 28           | 14             |
|               | CO2_4         | 8             | 14           | 20           | 34            | 44           | 32             |
|               | CO2_5         | 10            | 16           | 16           | 26            | 24           | 18             |
|               | CO2_6         | 8             | 16           | 19           | 33            | 37           | 25             |
|               | CO2_7         | 7             | 12           | 14           | 24            | 21           | 12             |
|               | CO2_12        | 8             | 13           | 16           | 29            | 25           | 18             |
| <b>Low</b>    | FLA1_2        | 7             | 13           | 17           | 29            | 35           | 17             |
|               | FLA1_4        | 6             | 12           | 19           | 33            | 37           | 25             |
|               | FLA1_5        | 6             | 12           | 17           | 32            | 38           | 24             |
|               | FLA1_6        | 7             | 13           | 18           | 31            | 35           | 24             |
|               | FLA1_10       | 8             | 15           | 24           | 47            | 54           | 30             |
|               | FLA1_14       | 8             | 17           | 27           | 40            | 50           | 31             |
|               | FLA1_15       | 9             | 16           | 20           | 37            | 51           | 25             |
|               | FLA1_16       | 7             | 14           | 19           | 38            | 47           | 19             |
| <b>Middle</b> | FLA2_1        | 10            | 17           | 25           | 41            | 56           | 44             |
|               | FLA2_2        | 7             | 13           | 16           | 31            | 36           | 23             |
|               | FLA2_4        | 7             | 16           | 21           | 43            | 54           | 36             |
|               | FLA2_6        | 9             | 16           | 22           | 37            | 38           | 25             |
|               | FLA2_7        | 10            | 20           | 31           | 52            | 61           | 36             |
|               | FLA2_8        | 8             | 15           | 21           | 38            | 39           | 29             |
|               | FLA2_9        | 6             | 14           | 18           | 39            | 49           | 27             |
|               | FLA2_12       | 7             | 14           | 17           | 28            | 41           | 24             |
| <b>High</b>   | FLA3_1        | 7             | 14           | 24           | 34            | 40           | 23             |
|               | FLA3_3        | 8             | 15           | 19           | 30            | 28           | 16             |
|               | FLA3_4        | 6             | 13           | 17           | 27            | 31           | 18             |
|               | FLA3_8        | 8             | 16           | 20           | 33            | 35           | 18             |
|               | FLA3_12       | 9             | 16           | 25           | 36            | 42           | 20             |
|               | FLA3_13       | 6             | 15           | 17           | 25            | 27           | 17             |
|               | FLA3_14       | 8             | 16           | 25           | 39            | 43           | 23             |
|               | FLA3_15       | 9             | 16           | 20           | 33            | 41           | 26             |
| <b>HFD</b>    | HF2_1         | 7             | 13           | 19           | 37            | 42           | 23             |
|               | HF2_2         | 15            | 34           | 42           | 61            | 62           | 35             |
|               | HF2_3         | 7             | 15           | 19           | 30            | 35           | 19             |
|               | HF2_4         | 16            | 27           | 39           | 54            | 65           | 25             |
|               | HF2_5         | 9             | 14           | 15           | 23            | 28           | 22             |
|               | HF2_6         | 9             | 16           | 22           | 44            | 43           | 23             |
|               | HF2_7         | 7             | 13           | 20           | 35            | 37           | 16             |
|               | HF2_8         | 6             | 13           | 19           | 32            | 34           | 19             |

Co, control group; HFD, high-fat diet; Low, 10% flaxseed group; Middle, 20% flaxseed group, High, 30% flaxseed group.

**Table S4.** The ingredients of the flaxseed powder

| Items                       | /100g   | NRV% |
|-----------------------------|---------|------|
| <b>Energy</b>               | 2208 kJ | 26%  |
| <b>Protein</b>              | 20.0 g  | 33%  |
| <b>Fat</b>                  | 43.0 g  | 72%  |
| Saturated fatty acids       | 4.0 g   | 20%  |
| Trans fatty acids           | 0.0 g   |      |
| Monounsaturated fatty acids | 9.0 g   |      |
| polyunsaturated fatty acids | 30.0 g  |      |
| <b>Carbohydrate</b>         | 29.0 g  | 10%  |
| <b>Dietary fiber</b>        | 24.0 g  | 96%  |
| <b>Sodium</b>               | 70 mg   | 4%   |

NRV, nutrient reference values

**Table S5.** Compositions of experimental diets

| Ingredient               | D12492 |       | Chow  |       | Low   |       | Middle |       | High  |       |
|--------------------------|--------|-------|-------|-------|-------|-------|--------|-------|-------|-------|
| Product                  | gm%    | Kcal% | gm%   | Kcal% | gm%   | Kcal% | gm%    | Kcal% | gm%   | Kcal% |
| Protein                  | 26.2   | 20    | 19.3  | 20    | 26.2  | 20    | 26.2   | 20    | 26.2  | 20    |
| Carbohydrate             | 26.3   | 20    | 67.6  | 70    | 26.3  | 20    | 26.3   | 20    | 26.3  | 20    |
| Fat                      | 34.9   | 60    | 2.4   | 10    | 34.9  | 60    | 34.9   | 60    | 34.9  | 60    |
|                          |        |       |       |       |       |       |        |       |       |       |
| Ingredient               | gm     | kcal  | gm    | kcal  | gm    | kcal  | gm     | kcal  | gm    | kcal  |
| Casein, 80 Mesh          | 200    | 800   | 200   | 800   | 184.5 | 738   | 169    | 676   | 153.6 | 614.4 |
| L-Cystine                | 3      | 12    | 3     | 12    | 3     | 12    | 3      | 12    | 3     | 12    |
| Flaxseed (protein)       | 0      | 0     | 0     | 0     | 15.5  | 62    | 31     | 124   | 46.4  | 185.6 |
| Flaxseed (fat)           | 0      | 0     | 0     | 0     | 33.3  | 299.7 | 66.6   | 599.4 | 99.8  | 898.2 |
| Flaxseed (carbohydrate)  | 0      | 0     | 0     | 0     | 3.9   | 15.6  | 7.7    | 30.8  | 11.6  | 46.4  |
| Flaxseed (dietary fiber) | 0      | 0     | 0     | 0     | 18.6  | 0     | 37.2   | 0     | 55.6  | 0     |
| Corn Starch              | 0      | 0     | 452.2 | 1809  | 0     | 0     | 0      | 0     | 0     | 0     |
| Maltodextrin 10          | 125    | 500   | 75    | 300   | 121.1 | 484.4 | 117.3  | 469.2 | 113.4 | 453.6 |
| Sucrose                  | 68.8   | 275.2 | 172.8 | 691   | 68.8  | 275.2 | 68.8   | 275.2 | 68.8  | 275.2 |
| Cellulose, BW200         | 50     | 0     | 50    | 0     | 31.4  | 0     | 12.8   | 0     | 0     | 0     |
| Soybean Oil              | 25     | 225   | 25    | 225   | 25    | 225   | 25     | 225   | 25    | 225   |

|                                       |       |        |      |      |       |        |       |        |       |        |
|---------------------------------------|-------|--------|------|------|-------|--------|-------|--------|-------|--------|
| Lard                                  | 245   | 2205   | 0    | 0    | 211.7 | 1905.3 | 178.4 | 1605.6 | 145.2 | 1306.8 |
| Mineral Mix S10026                    | 10    | 0      | 10   | 0    | 10    | 0      | 10    | 0      | 10    | 0      |
| DiCalcium Phosphate                   | 13    | 0      | 13   | 0    | 13    | 0      | 13    | 0      | 13    | 0      |
| Calcium Carbonate                     | 5.5   | 0      | 5.5  | 0    | 5.5   | 0      | 5.5   | 0      | 5.5   | 0      |
| Potassium Citrate, 1 H <sub>2</sub> O | 16.5  | 0      | 16.5 | 0    | 16.5  | 0      | 16.5  | 0      | 16.5  | 0      |
| Vitamin Mix V10001                    | 10    | 40     | 10   | 40   | 10    | 40     | 10    | 40     | 10    | 40     |
| Choline Bitartrate                    | 2     | 0      | 2    | 0    | 2     | 0      | 2     | 0      | 2     | 0      |
| FD&C Blue Dye #1                      | 0.05  | 0      | 0    | 0    | 0.05  | 0      | 0.05  | 0      | 0.05  | 0      |
| Total                                 | 773.8 | 4057.2 | 1035 | 3850 | 792.4 | 4057.2 | 811   | 4057.2 | 829.4 | 4057.2 |

Low, 10% flaxseed powder; Middle, 20% flaxseed powder; High, 30% flaxseed powder

**Table S6.** The sequences of primers of the C57BL/6J mouse used in quantitative real-time polymerase chain reaction (qRT-PCR)

| GENE   | Forward primer (5'→3') | Reverse primer (5'→3') |
|--------|------------------------|------------------------|
| Fxr    | TTCGAAAGAGCGGCATCTCC   | TAGGACATCGAGCAGAGGCT   |
| Cyp8b1 | GGACAGCCTATCCTTGGTGA   | CGGAACCTCCTGAACAGCTC   |
| Cyp7a1 | GTACCTTGATGAAAGTGGGAA  | ATTGCTTGATTTCTTGACAG   |
| Fgfr4  | TGTCAAATTCCGCTGTCCAG   | ACCACACTTTCCATCACCAG   |
| GAPDH  | AAGAAGGTGGTGAAGCAGG    | GAAGGTGGAAGAGTGGGAGT   |

Fxr, farnesoid X receptor, Cyp7a1, cholesterol 7 $\alpha$ -hydroxylase; Cyp8b1, sterol 12 $\alpha$ -hydroxylase; Fgfr4, fibroblast growth factor receptor 4;
